# Supplementary material for: Highly efficient sample stacking by enhanced field amplification on a simple paper device
Source: Royal Society of Chemistry journal article supplement (doi:10.1039/c6lc00633g), 2016-01-01
Supplement: c6lc00633g1.pdf [file c6lc00633g1.pdf]

Electronic Supplementary Information (ESI) for Lab on a Chip.

This journal is © The Royal Society of Chemistry.

Electronic Supplementary Information (ESI)

**Highly Efficient Sample Stacking by Enhanced Field Amplification  
on a Simple Paper Device**

Biao Ma, Yi Zhen Song, Ji Cheng Niu and Zhi-Yong Wu\*

Research Center for Analytical Sciences, Chemistry Department, College of Sciences,  
Northeastern University, Shenyang 110819, P. R. China. Tel/Fax: +86(0)2483687659  
E-mail: [zywu@mail.neu.edu.cn](mailto:zywu@mail.neu.edu.cn)

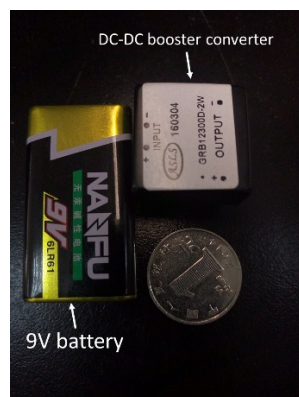

**Figure S1** Picture of the battery driven power supply. The power supply is comprised of a DC-DC booster converter (output voltage is 300 V) and a 9 V battery. The booster converter is low cost (\$ 23), which is also applicable to other handheld power sources.

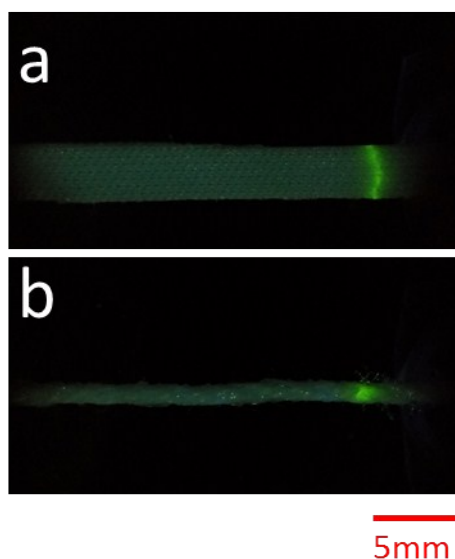

**Figure S2** Demonstration of eFASS on different fiber substrates: (a) a piece of polyester cleaning cloth (30 mm×3 mm), (b) a cotton thread (30 mm long, 1 mm in diameter). Both the thread and cloth were purchased from local textile market without any pre-treatments. Sample solution was 1  $\mu$ M fluorescein sodium prepared with 2 mM Tris-HCl and the BGE was consist of 200 mM Tris-HCl and 1 % PVP. The voltage was 300V from the battery driven power supply.
